# Supplementary material for: Prenylated Polyphenols from Broussonetia kazinoki as Inhibitors of Nitric Oxide Production
Source: MDPI journal article supplement (doi:10.3390/molecules23030639), 2018-03-12
Supplement: s1 [file s1]

## Supplementary Materials

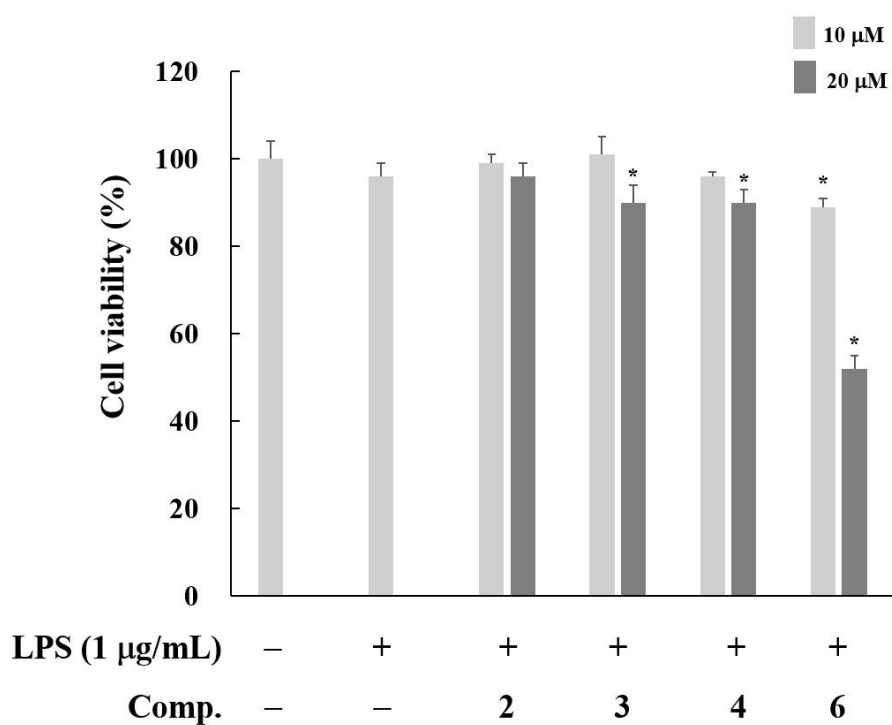

**Figure S1.** The effect of compounds **2-4** and **6** on cell viability of RAW 264.7 macrophages. Cells were treated with LPS (1 µg/mL) in presence or absence of test compounds (10 and 20 µM). Cell viability was determined by MTT assay. The values are expressed as the means ± S.D. of three experiments. \*  $p < 0.05$  ( vs. vehicle control).
